# Supplementary material
Source: PubMed Central journal article supplement (PMC365708)

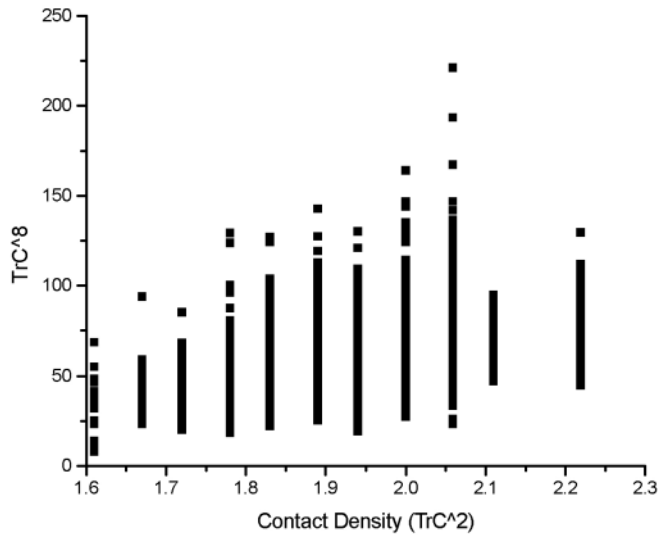

Supplement: pnas_101_9_2846__2.pdf [file pnas_101_9_2846__2.pdf]

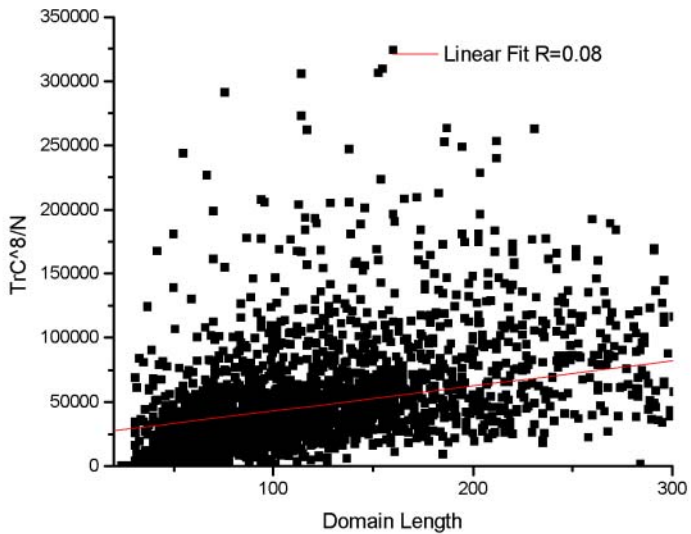

Supplement: pnas_101_9_2846__6.pdf [file pnas_101_9_2846__6.pdf]

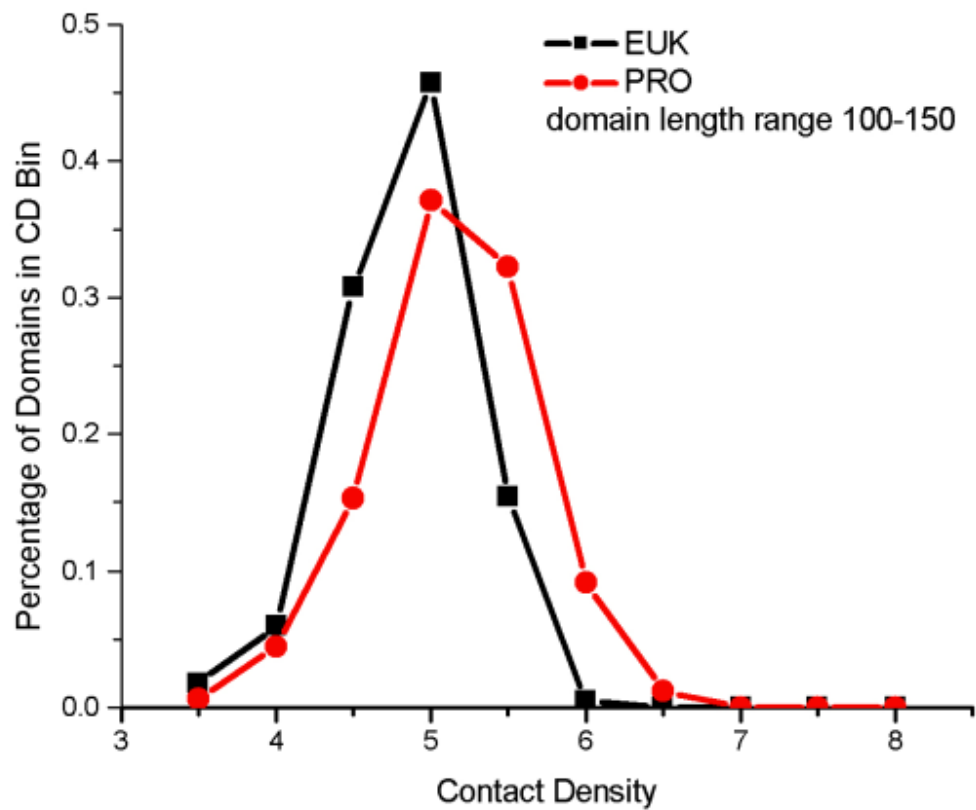

a

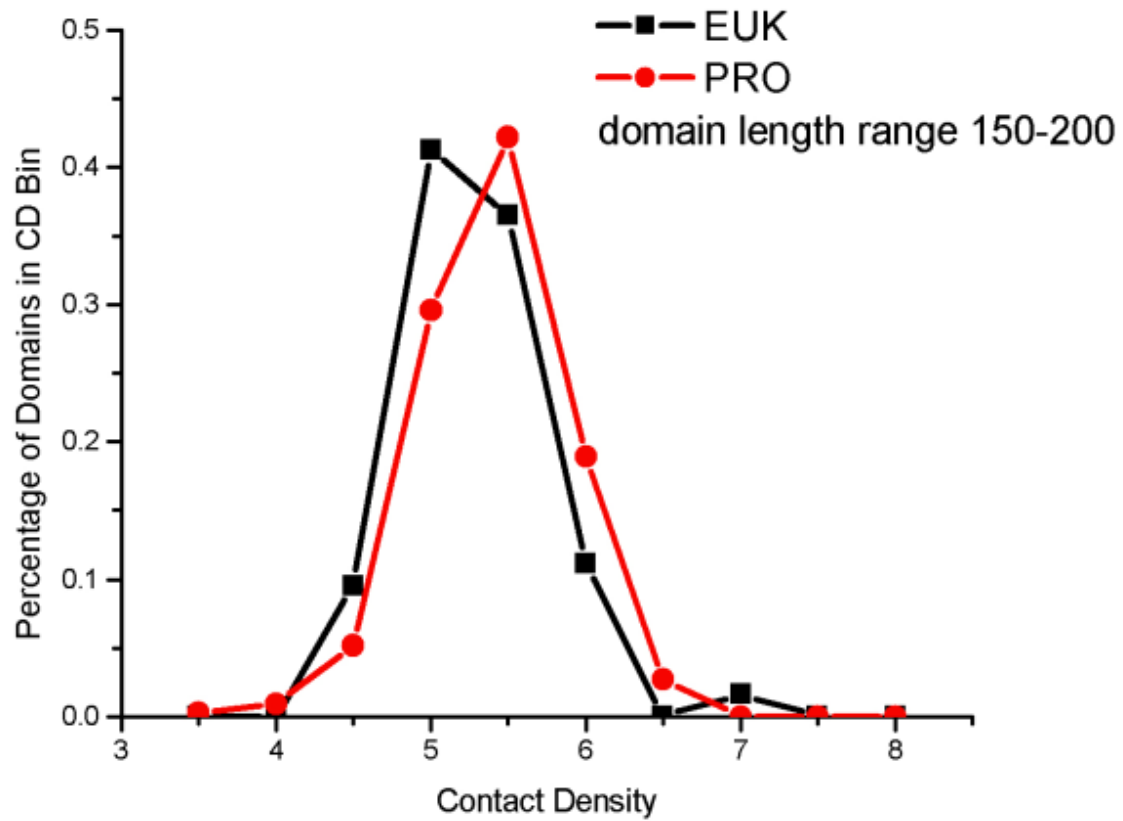

b

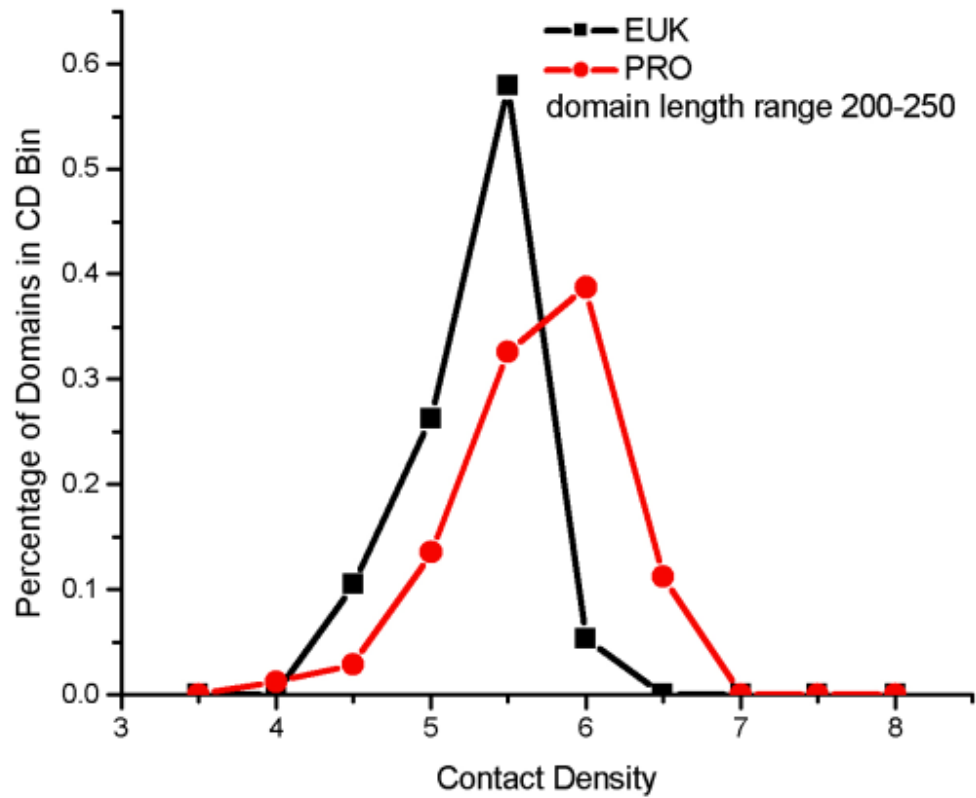

C

Supplement: pnas_101_9_2846__8.pdf [file pnas_101_9_2846__8.pdf]
